# Supplementary material for: Silicon Carbide-Gated Nanofluidic Membrane for Active Control of Electrokinetic Ionic Transport
Source: MDPI journal article supplement (doi:10.3390/membranes11070535), 2021-07-15
Supplement: s1 [file s1]

## Supplementary Information

# Silicon carbide gated nanofluidic membrane for active control of electrokinetic ionic transport

Antonia Silvestri <sup>1,2</sup>, Nicola Di Trani <sup>2</sup>, Giancarlo Canavese <sup>3</sup>, Paolo Motto Ros <sup>1</sup>, Leonardo Iannucci <sup>3</sup>, Sabrina Grassini <sup>3</sup>, Yu Wang <sup>2</sup>, Xuewu Liu <sup>2</sup>, Danilo Demarchi <sup>1</sup> and Alessandro Grattoni <sup>2,4,5,\*</sup>

<sup>1</sup> Department of Electronics and Telecommunications, Polytechnic of Turin, 10129 Turin, Italy; [antonia.silvestri@polito.it](mailto:antonia.silvestri@polito.it) (A.S); [paolo.mottoros@polito.it](mailto:paolo.mottoros@polito.it) (P.M.R.); [danilo.demarchi@polito.it](mailto:danilo.demarchi@polito.it) (D.D)

<sup>2</sup> Department of Nanomedicine, Houston Methodist Research Institute, Houston, TX 77030, USA; [nditrani@houstonmethodist.org](mailto:nditrani@houstonmethodist.org) (N.D.T.); [xliu@houstonmethodist.org](mailto:xliu@houstonmethodist.org) (X.L.); [ywang2@houstonmethodist.org](mailto:ywang2@houstonmethodist.org) (Y.W.)

<sup>3</sup> Department of Applied Science and Technology, Polytechnic of Turin, 10129 Turin, Italy; [giancarlo.canavese@polito.it](mailto:giancarlo.canavese@polito.it) (G.C.); [leonardo.iannucci@polito.it](mailto:leonardo.iannucci@polito.it) (L.I.); [sabrina.grassini@polito.it](mailto:sabrina.grassini@polito.it) (S.G.)

<sup>4</sup> Department of Surgery, Houston Methodist Research Institute, Houston, TX 77030, USA;

<sup>5</sup> Department of Radiation Oncology, Houston Methodist Research Institute, Houston, TX 77030, USA;

\* Correspondence: [agrattoni@houstonmethodist.org](mailto:agrattoni@houstonmethodist.org) (A.G.); Tel.: +1-(713)-441-7324 (A.G.)

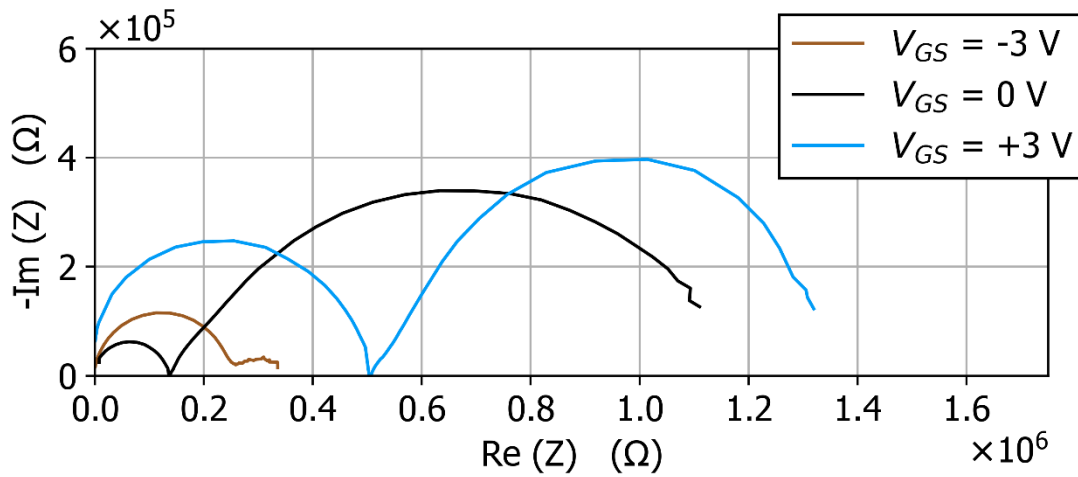

**Figure S1.** Impedance measurements presented as Nyquist plots performed on the a-SiC blank device recorded at different  $V_{GS}$ .
